# Supplementary material for: The Photocatalytic Activity of CaTiO3 Derived from the Microwave-Melting Heating Process of Blast Furnace Slag
Source: MDPI journal article supplement (doi:10.3390/nano13081412), 2023-04-19
Supplement: s1 [file s1]

## Supplementary Materials

# The Photocatalytic Activity of CaTiO<sub>3</sub> Derived from the Microwave-Melting Heating Process of Blast Furnace Slag

Jun Xie <sup>1</sup>, Qing Ye <sup>1,2,\*</sup>, Jianghao Zhou <sup>3</sup>, Yue Liao <sup>1</sup> and Gongming Qian <sup>1,2,\*</sup>

<sup>1</sup> School of Resource and Environmental Engineering, Wuhan University of Science and Technology, Wuhan 430081, China; junxie0mineral@wust.edu.cn (J.X.)

<sup>2</sup> Hubei Key Laboratory for Efficient Utilization and Agglomeration of Metallurgic Mineral Resources, Wuhan 430081, China

<sup>3</sup> School of Materials and Metallurgy, Wuhan University of Science and Technology, Wuhan 430081, China

\* Correspondence: yeqing@wust.edu.cn (Q.Y.); qiangongming@wust.edu.cn (G.Q.); Tel.: +86-13476834865 (G.Q.)

**Table S1.** The Gibbs free energy of MB molecular and intermediate products.

| Compound                                                                            | Gibbs free energy/ eV |
|-------------------------------------------------------------------------------------|-----------------------|
| 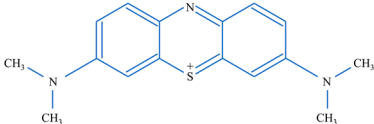  | -1182.80              |
|  | -1258.60              |
|  | -1334.39              |
|  | -1486.06              |
|  | -1489.64              |
|  | -1710.00              |

---

|                           |                             |                                                                                   |                              |                                                                                   |                      |          |
|---------------------------|-----------------------------|-----------------------------------------------------------------------------------|------------------------------|-----------------------------------------------------------------------------------|----------------------|----------|
| $\text{SO}_4^{2-}$<br>(1) | $\text{H}_2\text{O}$<br>(4) | 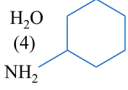 | $\text{HN}=\text{C}$         |  | $\text{CO}_2$<br>(4) | -2396.12 |
| $\text{NO}_3^-$<br>(0.5)  | $\text{NH}_4^+$<br>(2.5)    | $\text{SO}_4^{2-}$<br>(1)                                                         | $\text{H}_2\text{O}$<br>(16) | $\text{CO}_2$<br>(16)                                                             |                      | -5223.41 |

---
